# Supplementary material for: Effect of ocean acidification on early life stages of Atlantic herring ( Clupea harengus L.)
Source: Copernicus journal article supplement (doi:10.5194/bg-8-3697-2011), 2011-12-15
Supplement: Supplementary file 1 [file data set_Franke_Clemmesen.xls]

## Sheet: Tabelle1
Treatment	Replicate	pCO2 ± SD (µatm)	Malformed eggs (%)	Mortality rate (%)	Hatch rate (%)	Total length (mm)	Dry weight (µg)	Yolk sac area (mm2)	Sagitta area (µm2)	Lapillus area (µm2)	RNA/DNA	RNA/Dry weight (µg/mg)	DNA/Dry weight (µg/mg)
Control	1	480 ± 81	12	14.9126	78.3505	5.998	42.55	0.493333	371.835	345.102	3.81452	42.1388	11.2665
Control	2	480 ± 81	6.5	7.69048	80.1987	5.975	40.55	0.468333	382.71	313.963	3.23872	37.356	11.5989
Control	3	480 ± 81	4.2	5.48205	78.7584	6.11167	45.4167	0.448333	393.152	347.175	3.10437	34.3282	11.1411
Control	4	480 ± 81	4.8	8.1557	79.7203	6.17333	38.8333	0.448333	388.602	340.692
1	1	1260 ± 218	10.7	12.081	88.0952	6.31333	43.45	0.508333	397.04	337.377
1	2	1260 ± 218	4	6.58065	92.2078	6.04167	42.6167	0.431667	371.345	340.89
1	3	1260 ± 218	1.9	1.9	95.6522	6.01167	43.1333	0.475	408.48	363.043
1	4	1260 ± 218	3.6	6.87869	91.0569	6.96167	44.85	0.43	443.87	391.467
2	1	1859 ± 240	6.4	8.30476	91.6667	6.31	40.2167	0.416	416.963	379.318	2.81738	33.0253	11.6774
2	2	1859 ± 240	2.8	2.8	94.1748	5.90833	42.4833	0.428333	416.147	344.242	2.86715	35.6525	12.4215
2	3	1859 ± 240	3	5.49438	87.5	6.166	53.94	0.558	428.513	372.962	3.00191	36.8776	12.4534
2	4	1859 ± 240	10.6	12.9256	86.1538	6.47333	48.85	0.446667	419.07	374.02
3	1	2626 ± 197	5.8	9.96667	74.7059	6.34667	38.7667	0.516667	393.592	350.85	2.61511	28.2853	10.9673
3	2	2626 ± 197	4.5	6.85294	81.2903	6.515	47.45	0.518	408.448	379.862	2.96227	33.1535	11.2215
3	3	2626 ± 197	4.2	5.92414	92.3077	6.54	50.2	0.564	433.195	392.68	3.32975	31.5517	9.56662
3	4	2626 ± 197	2.8	4	93.4783	6.35667	49.82	0.46	390.545	341.822
4	1	2903 ± 204	3.3	4.8	81.7857	6.32	52.52	0.488	427.507	378.408	3.4656	38.8365	11.2429
4	2	2903 ± 204	9.7	14.8282	79.3103	6.28	45.3167	0.562	470.498	418.962	2.53131	25.7329	10.4976
4	3	2903 ± 204	11	18.2727	66.2791	6.315	54.2833	0.51	409.312	371.393	2.7385	25.0465	9.37526
4	4	2903 ± 204	3.1	3.77114	86.1538	6.26	41.2333	0.451667	382.535	329.997
5	1	4635 ± 340	38.8	51.0012	48.2166	6.03167	45.95	0.6	374.778	353.602	2.55737	28.2178	11.0999
5	2	4635 ± 340	5.7	10.1444	85.1562	6.29833	45.4167	0.378333	406.115	365.882	2.5	32.8522	13.2013
5	3	4635 ± 340	1.9	2.35249	88.4422	5.99667	42.9833	0.473333	383.273	343.757	2.51932	31.3357	12.5121
5	4	4635 ± 340	7.2	7.2	80.1587	6.14833	44.95	0.458333	435.122	391.213
